# Supplementary material for: Development of a Multiprotein Classifier for the Detection of Early Stage Ovarian Cancer
Source: MDPI journal article supplement (doi:10.3390/cancers14133077), 2022-06-23
Supplement: s1 [file s1]

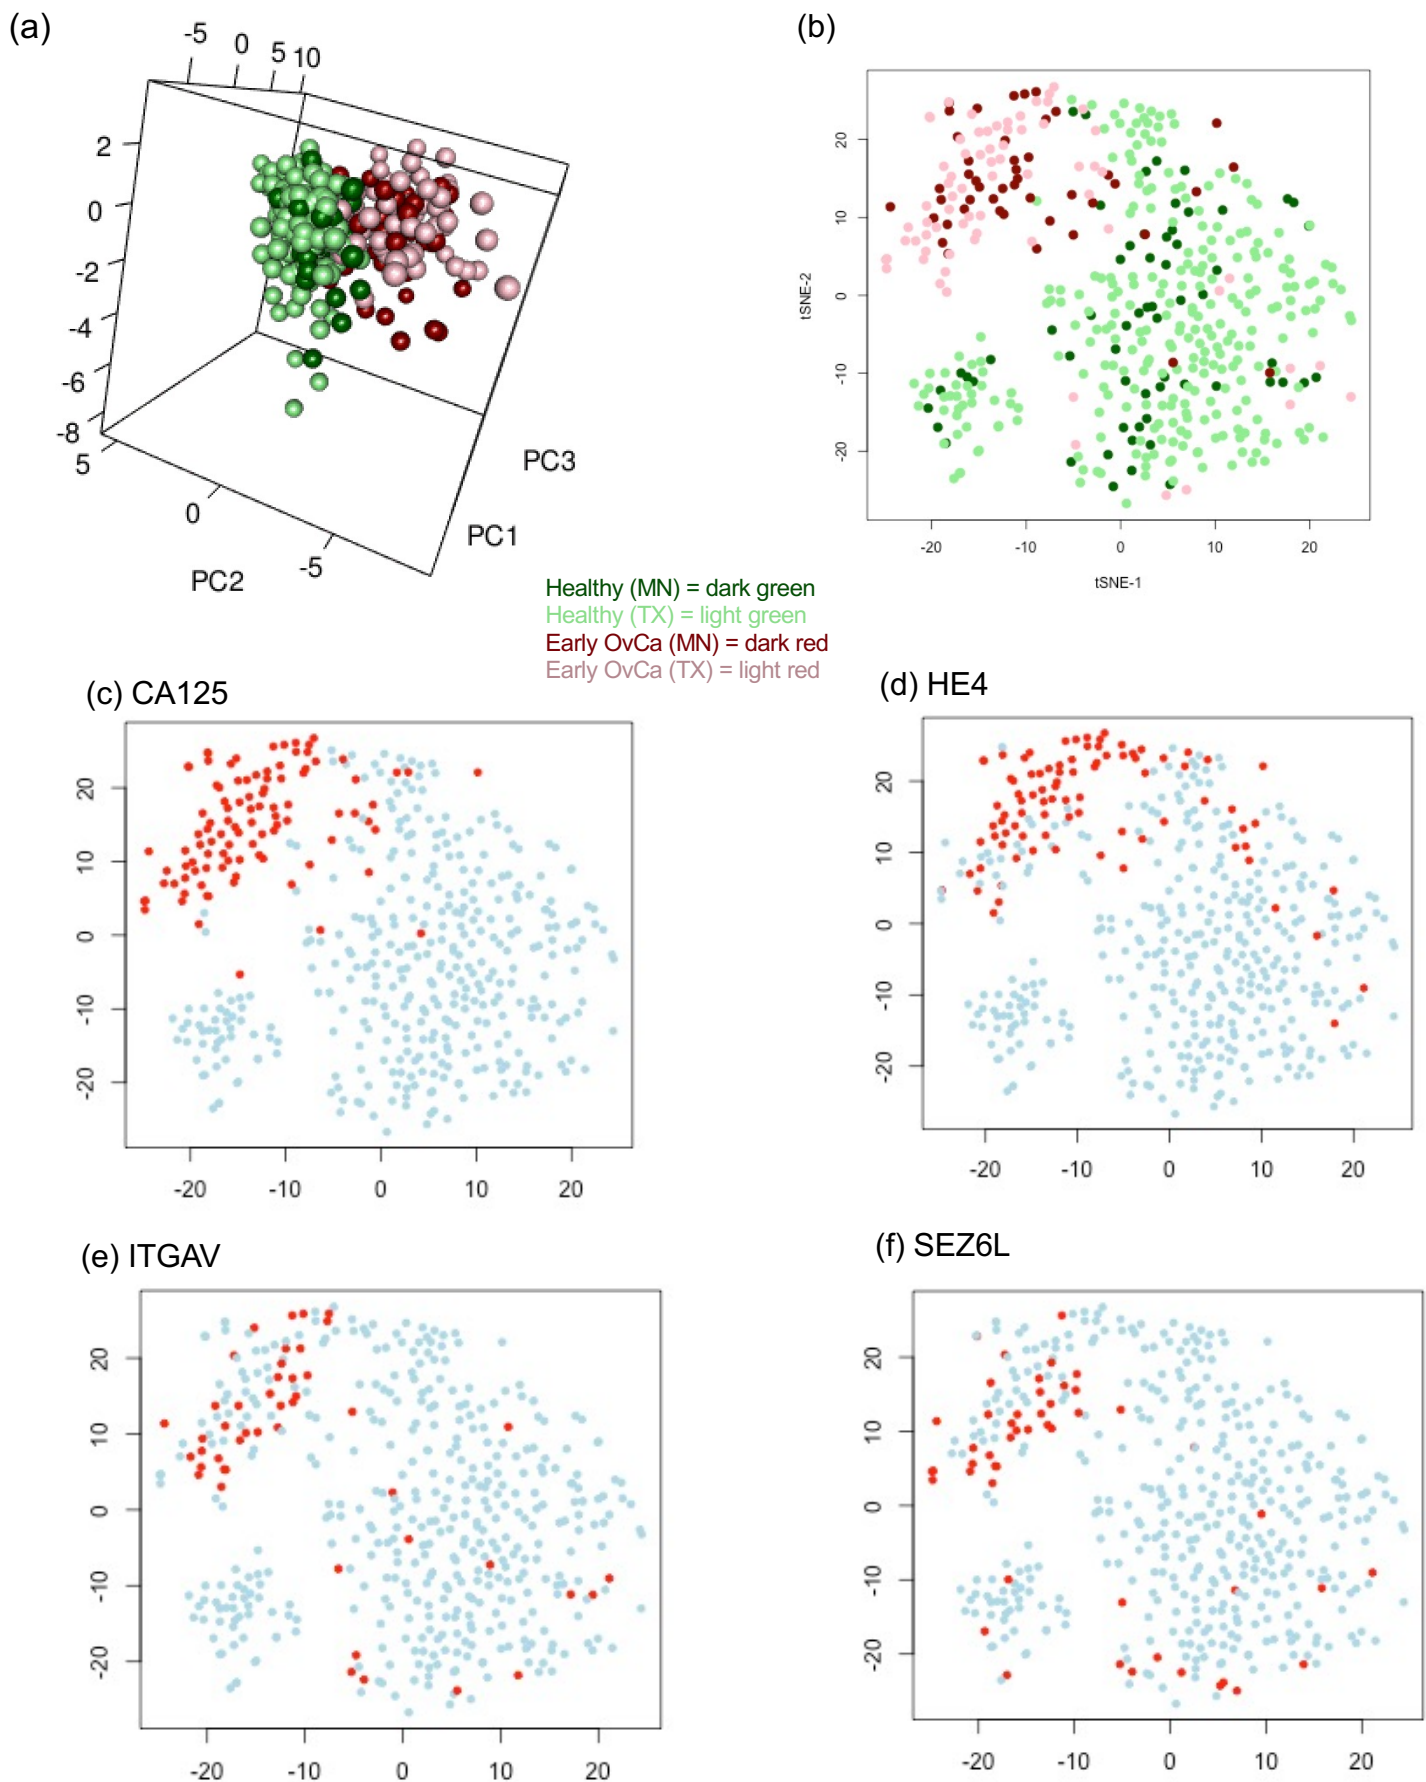

**Supplementary Figure S1.** Plots of 452 serum samples clustered by 67 proteins. PCA (a) and t-SNE plots (b) show that the 116 early stage ovarian cancer samples (red; clustered in the upper left corner of the plot) separate from the 336 healthy control samples (green) in Cohort #1. (c-f) t-SNE plots colored by protein levels: (c) CA125 ELISA values  $> 35$  ( $5.13 \log_2$ ) = red, (d) HE4  $> 8.8$  = red, (e) ITGAV  $< 2.6$  = red, and (f) SEZ6L  $< 2.1$  = red.

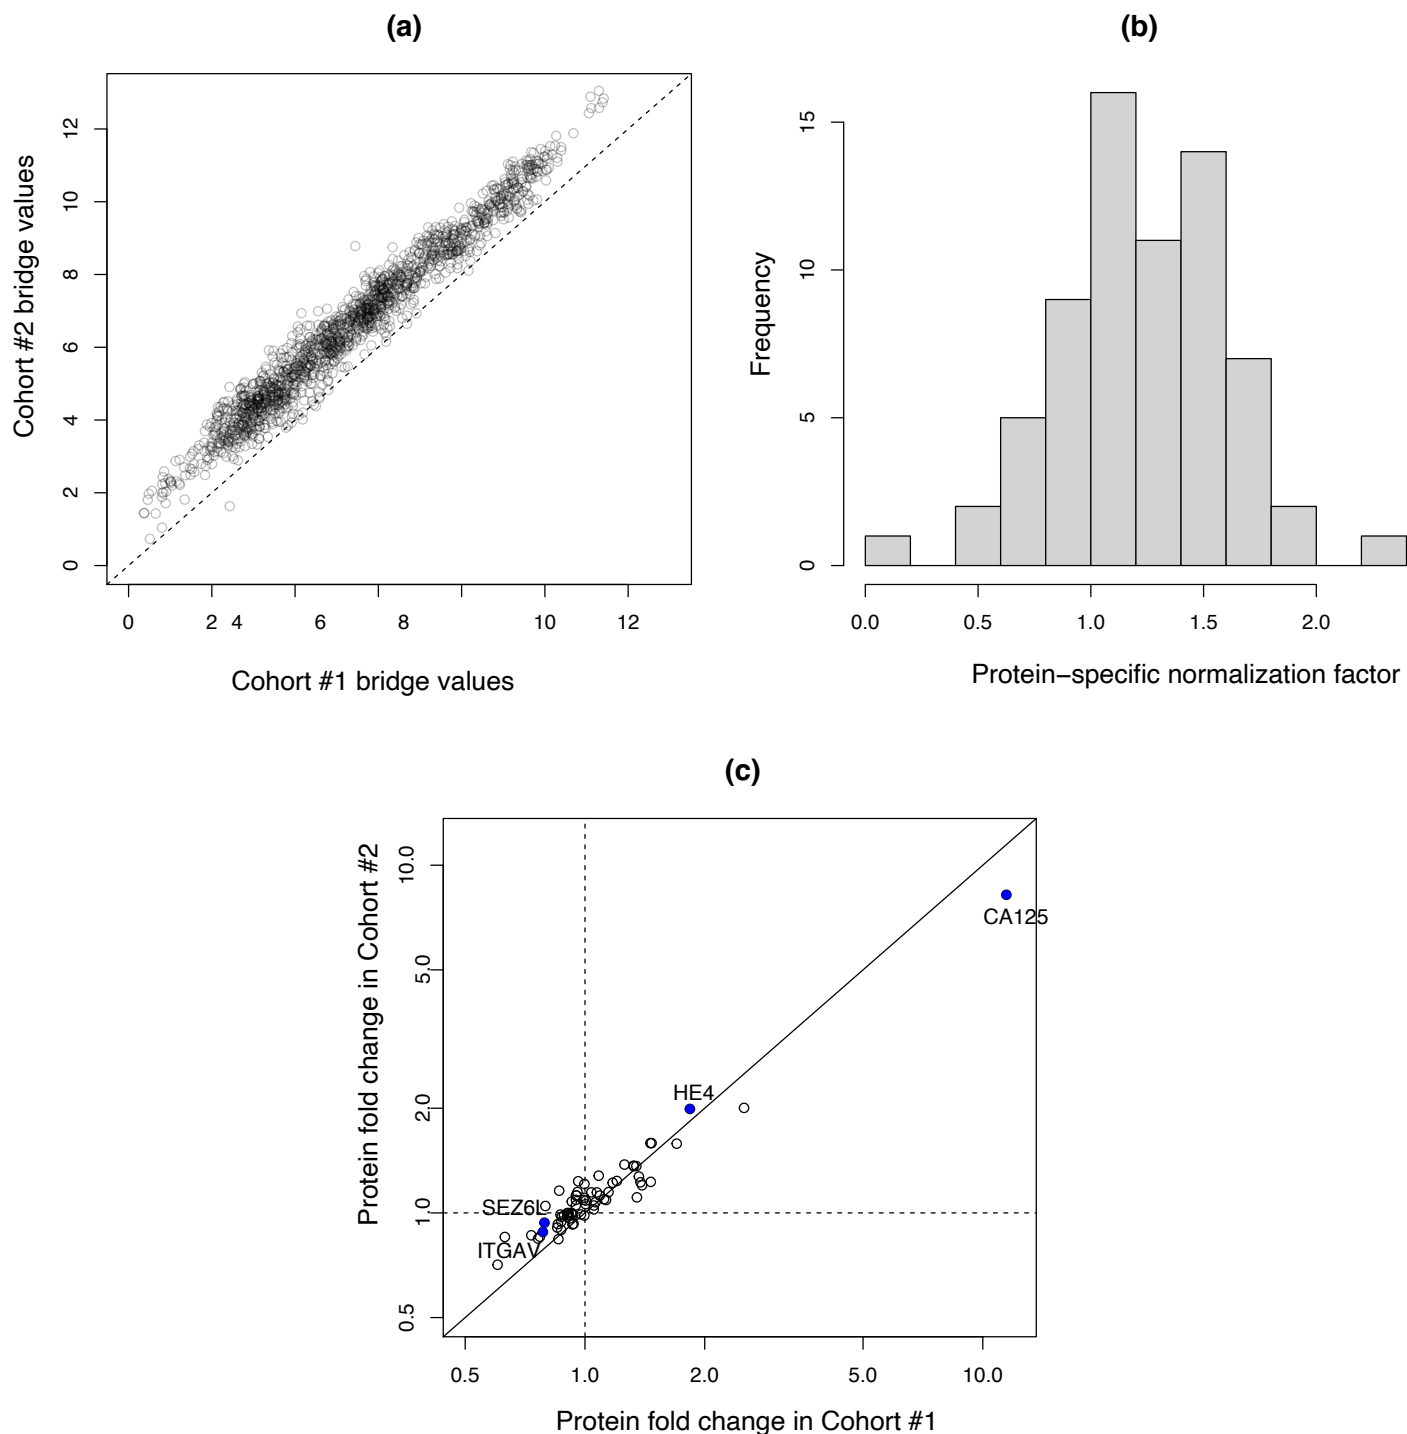

**Supplementary Figure S2.** Normalization of Cohort #2 using “bridge” samples from Cohort #1. (a) Prior to normalization, the association between the NPX values from Cohort #1 vs. Cohort #2 for the 22 bridge samples across all 68 proteins. (b) The protein-specific normalization factors for the 68 proteins. (c) Protein fold changes in Cohort #1 vs. Cohort #2.
